# Supplementary material
Source: PubMed Central journal article supplement (PMC8865091)

## Electronic Supplementary Material

**Online Resource 1** Four-hour ICV propranolol (versus vehicle) pretreatment had no effect on body temperature. Four hours after ICV propranolol or vehicle, IP distilled water treatment was administered, and change in body temperature from baseline was recorded for 90 minutes in TG and WT. There was no effect of pretreatment in TG or WT, and there was no effect of mouse line (RM and mixed-design ANOVAs, all  $p > 0.05$ ). Veh, vehicle; Prl, propranolol; SEM, standard error of the mean

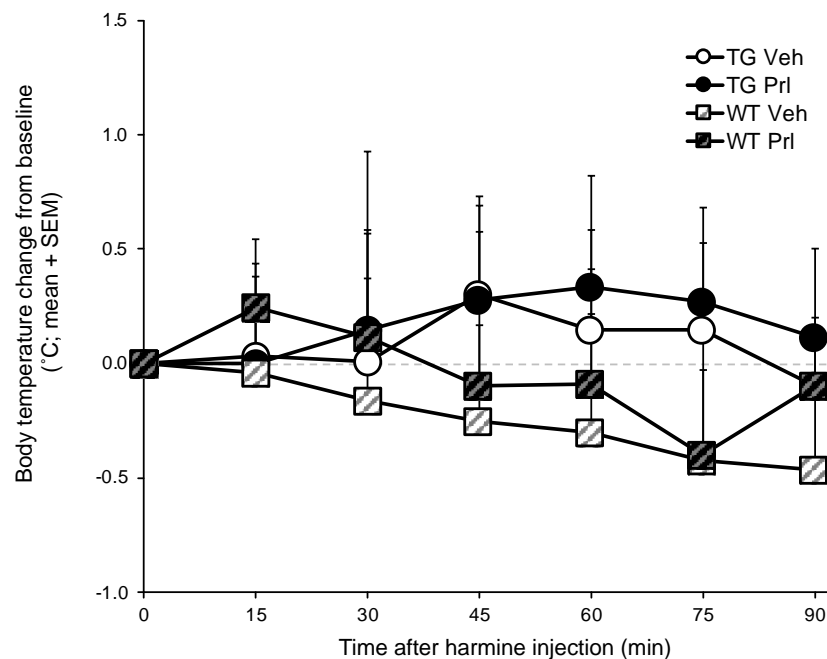

Supplement: NIHMS1776128-supplement-Online_Resource_1.pdf [file NIHMS1776128-supplement-Online_Resource_1.pdf]
