# Supplementary material
Source: PubMed Central journal article supplement (PMC8865091)

## Supplementary Material

**Online Resource 2** ICV propranolol (versus vehicle) pretreatment increased peak tremor in TG. Four-hour propranolol (versus vehicle) pretreatment increased peak tremor in **(a)** TG ( $t(15) = 4.20$ ,  $p = 0.0008$ ), but not in **(b)** WT. Twenty-four-hour propranolol (versus vehicle) pretreatment trended towards increasing peak tremor in **(c)** TG ( $t(24) = 1.77$ ,  $p = 0.0887$ ), but had no effect in **(d)** WT. Veh, vehicle; Prl, propranolol; SEM, standard error of the mean

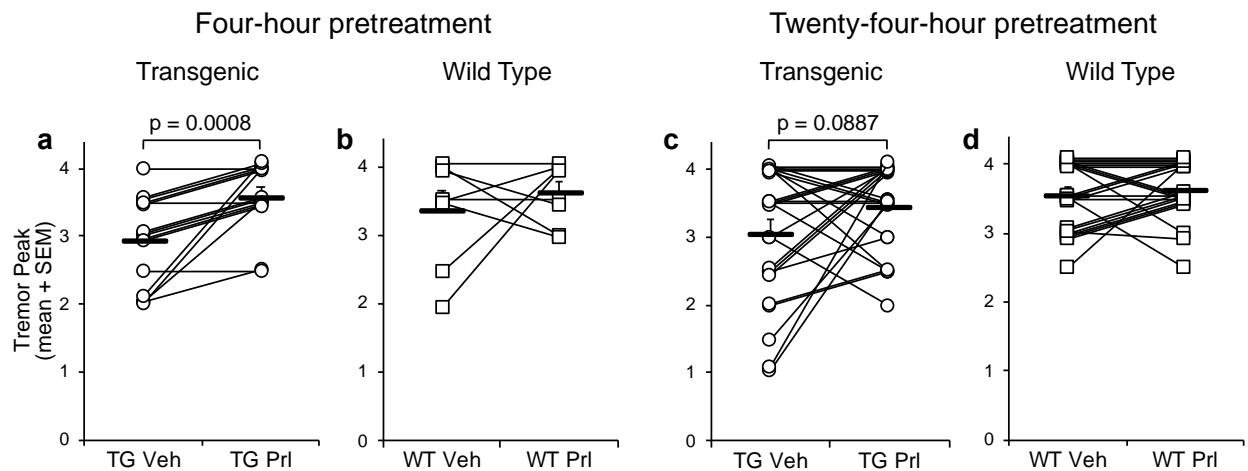

Supplement: NIHMS1776128-supplement-Online_Resource_2.pdf [file NIHMS1776128-supplement-Online_Resource_2.pdf]
